# Supplementary material for: Understanding the role of nickel–iron (oxy)hydroxide (NiFeOOH) electrocatalysts on hematite photoanodes
Source: Royal Society of Chemistry journal article supplement (doi:10.1039/d0se01500h), 2020-12-09
Supplement: d0se01500h1.pdf [file d0se01500h1.pdf]

## Supplementary Information

# Understanding the Role of Nickel–Iron (Oxy)hydroxide (NiFeOOH) Electrocatalysts on Hematite Photoanodes

Jihye Lee, Daye Seo, Sunghwan Won and Taek Dong Chung\*

*Department of Chemistry, Seoul National University, Seoul 08826, Republic of Korea.*

\*T. D. C (email: [tdchung@snu.ac.kr](mailto:tdchung@snu.ac.kr))

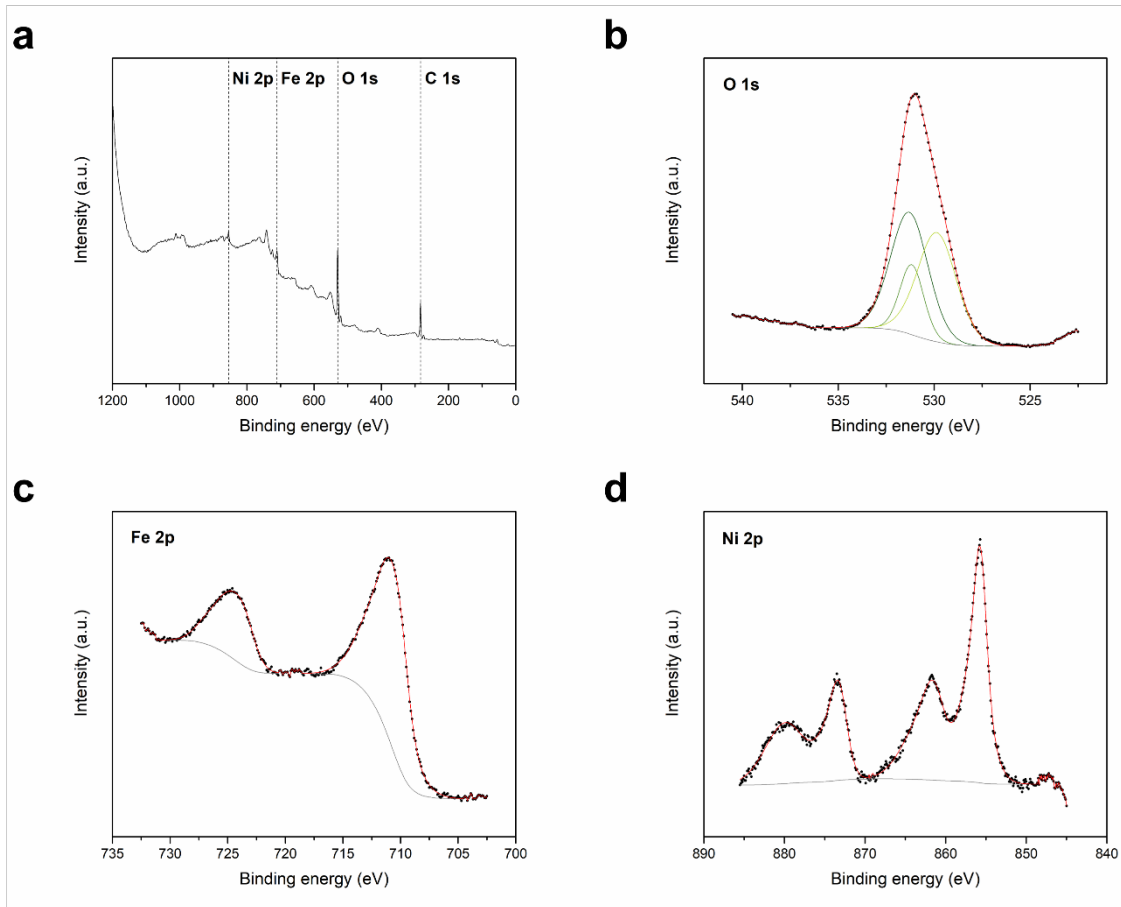

**Fig. S1** XPS core level spectra of Ni 2p region, Fe 2p region, and O 1s region for the NiFeOOH film deposited at 1 V (vs. Ag/AgCl) for 30 min on the Au substrate.

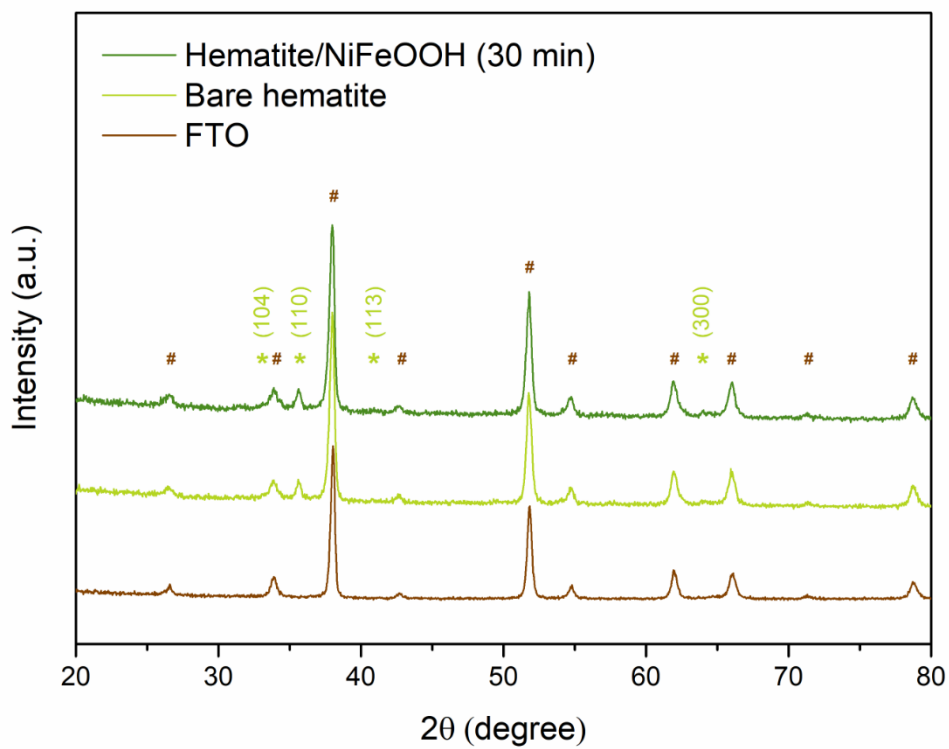

**Fig. S2** XRD patterns of FTO substrate (brown), bare hematite (light green) and NiFeOOH-coated hematite (dark green). The diffraction peaks labeled with a hash correspond to FTO. The diffraction peaks labeled with an asterisk are for hematite.

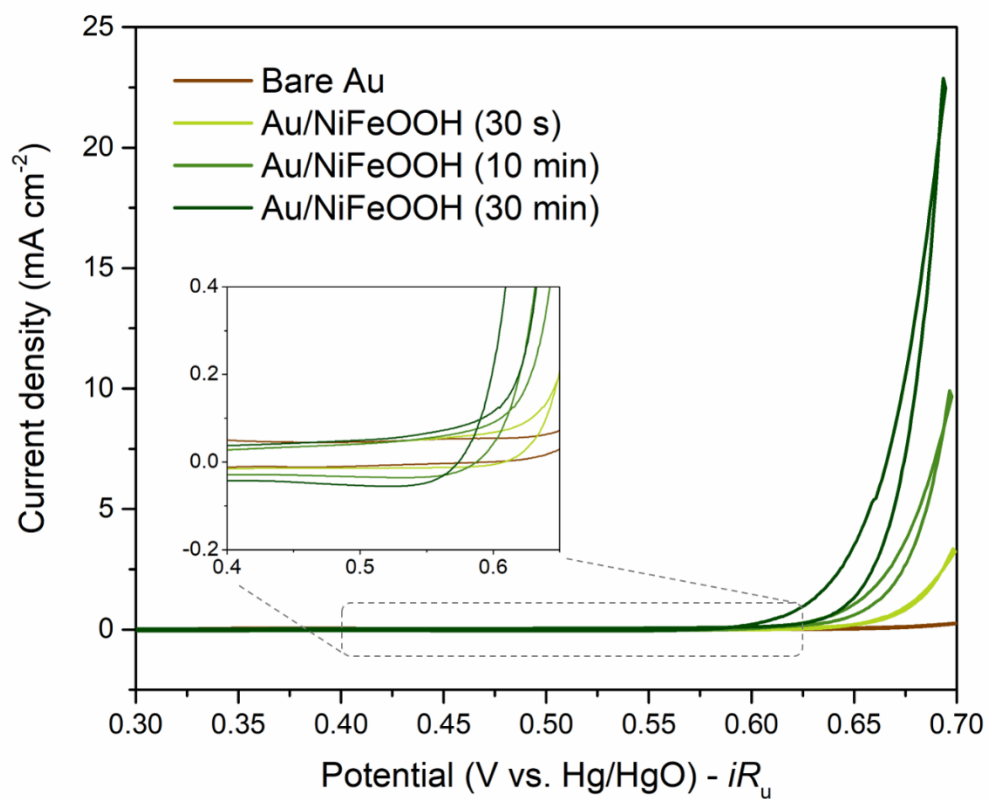

**Fig. S3**  $iR_u$ -corrected cyclic voltammograms of NiFeOOH electrocatalysts on Au substrates in 1 M KOH at the scan rate of  $10 \text{ mV s}^{-1}$ .

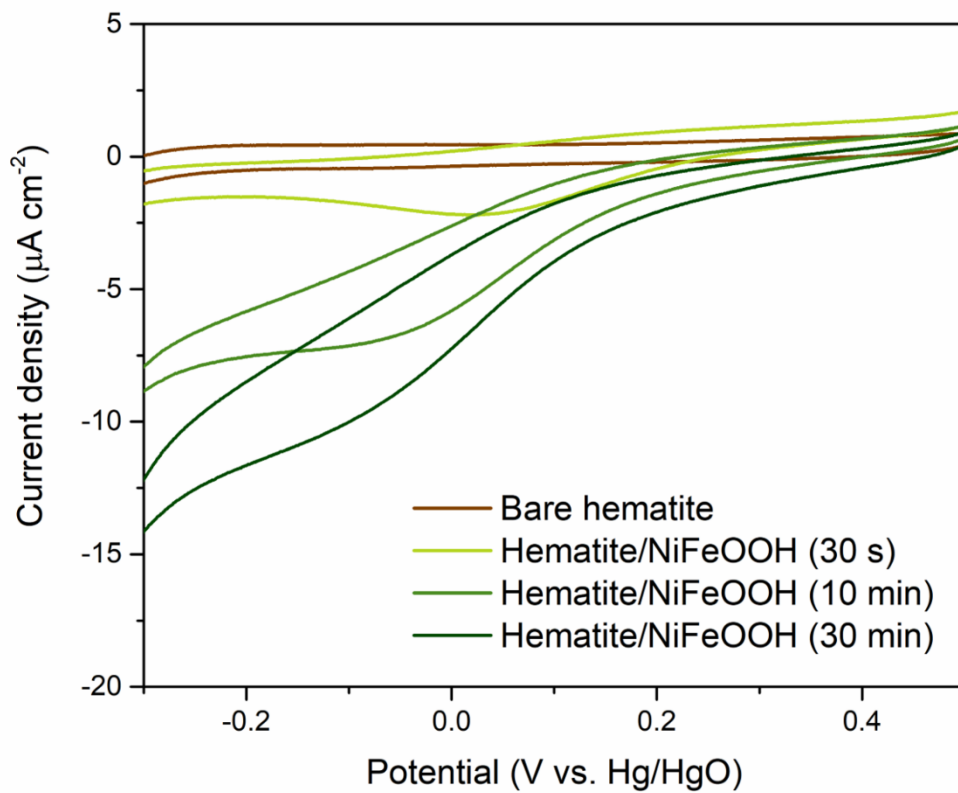

**Fig. S4** Cyclic voltammograms of hematite photoanodes with varying thicknesses of NiFeOOH film in 1 M KOH at the scan rate of  $10 \text{ mV s}^{-1}$  in the dark.

**Table S1** Electronic properties obtained from Mott-Schottky analysis.

|                           | Slope                 | $N_D$ (cm <sup>-3</sup> ) | $E_{FB}$ (V) |
|---------------------------|-----------------------|---------------------------|--------------|
| Bare hematite             | $5.56 \times 10^{10}$ | $7.92 \times 10^{19}$     | -0.37        |
| Hematite/NiFeOOH (30 s)   | $4.80 \times 10^{10}$ | $9.18 \times 10^{19}$     | -0.39        |
| Hematite/NiFeOOH (30 min) | $5.92 \times 10^{10}$ | $7.44 \times 10^{19}$     | -0.37        |

$$\frac{1}{C_{SC}^2} = \frac{2}{\epsilon_0 \epsilon_r e N_D A^2} \left( E - E_{FB} - \frac{kT}{e} \right)$$

where  $C_{SC}$  is the space charge capacitance at the surface of the hematite electrode,  $\epsilon_0$  is the permittivity of vacuum,  $\epsilon_r$  is the relative permittivity (assumed to be 32 for hematite<sup>1</sup>),  $e$  is the elementary charge,  $N_D$  is the donor density,  $A$  is the geometric surface area,  $E$  is the applied potential,  $E_{FB}$  is the flat band potential,  $k$  is the Boltzmann constant,  $T$  is the absolute temperature.

## References

- 1 O. Zandi, A. R. Schon, H. Hajibabaei and T. W. Hamann, *Chem. Mater.*, 2016, **28**, 765–771.
